1 Electrophysiological evidence for polarization sensitivity in the camera-type eyes of the  
2 aquatic predacious insect larva, *Thermonectus marmoratus* (Coleoptera: Dytiscidae)

3  
4  
5  
6

7 **Running title: Polarization sensitivity in beetle larva.**

8  
9

10  
11  
12  
13

14 Annette Stowasser and Elke K. Buschbeck\*

15 Department of Biological Sciences, University of Cincinnati, Cincinnati, OH 45221-0006, USA

16  
17  
18  
19  
20  
21  
22  
23

24 \* Author for correspondence (e-mail: [elke.buschbeck@uc.edu](mailto:elke.buschbeck@uc.edu))

25  
26  
27  
28  
29  
30

31 Key words: stemmata, prey capture, eye, predator, e-vector

## 32 **Summary**

33 Polarization sensitivity has most often been studied in mature insects, yet it is likely that larvae  
34 also make use of this visual modality. The aquatic larvae of the predacious diving beetle  
35 *Thermonectus marmoratus* are highly successful visually guided predators, with a UV-sensitive  
36 proximal retina that, according to its ultrastructure, has three distinct cell types with anatomical  
37 attributes that are consistent with polarization sensitivity. In the present study we used  
38 electrophysiological methods and single-cell staining to confirm polarization sensitivity in the  
39 proximal retinas of both principal eyes of these larvae. As expected from their microvillar  
40 orientation, cells of type T1 are most sensitive to vertically polarized light, while cells of type T2  
41 are most sensitive to horizontally polarized light. In addition, T3 cells likely constitute a second  
42 population of cells that are most sensitive to light with vertical e-vector orientation, characterized  
43 by shallower polarization modulations, and smaller polarization sensitivity (PS) values than are  
44 typical for T1 cells. The level of PS values found in this study suggests that polarization  
45 sensitivity likely plays an important role in the visual system of these larvae. Based on their  
46 natural history and behavior, possible functions are: (1) finding water after hatching, (2) finding  
47 the shore before pupation, and (3) making prey more visible, by filtering out horizontally  
48 polarized haze, and/or using polarization features for prey detection.

## 50 **Introduction**

51  
52 Polarization cues are known to be important for many adult insects. Most commonly they are  
53 used for navigation, habitat or ovipositor site detection as well, as for finding mates. In aquatic  
54 habitats, animals such as certain fish, lobster, crabs, crayfish, mantis shrimp, and cephalopods  
55 have been found to use polarization sensitivity for communication, to improve the visual contrast  
56 of their surroundings, or to detect prey (Horváth and Varjú, 2004; Shashar et al., 2011; Wehner,  
57 2001). While it has been suggested that polarization vision for contrast enhancement and prey  
58 detection could also play a role in insect visual systems (Horváth and Varjú, 2004; Schneider and  
59 Langer, 1969; Trujillo-Cenóz and Bernard, 1972), to the best of our knowledge, this has never  
60 been demonstrated. Even less is known about polarization sensitivity in insect larvae. With  
61 regard to the latter we only know that some, such as gypsy moth larvae, sawfly larvae, mosquito  
62 larvae, and tent caterpillar larvae, show polarotaxis (Baylor and Smith, 1953; Doane and

63 Leonard, 1975; Gilbert, 1994; Meyer-Rochow, 1974; Sullivan and Wellington, 1953;  
64 Wellington, 1955; Wellington et al., 1951). Previously our group presented ultrastructural data  
65 that raised the possibility of the existence of polarization sensitivity in a specialized region of the  
66 complex principal eyes of *Thermonectus marmoratus* larvae (Stecher et al., 2010). These larvae  
67 are highly successful visually guided aquatic predators, which could potentially exploit  
68 polarization sensitivity to improve contrast and see prey better. We present electrophysiological  
69 data that confirms our anatomical predictions, both with regard to the existence of polarization  
70 sensitivity, and with regard to the e-vector orientation to which individual cell types are  
71 maximally sensitive.

72         There are two main sources of polarized light in natural environments, 1) the scattering of  
73 light in bulk media such as the atmosphere or water, and 2) the light reflected from shiny  
74 surfaces (Horváth and Varjú, 2004) for detailed background). In the air, polarized light comes  
75 from light scattering in the atmosphere with a predictable polarization pattern that changes  
76 slowly over time. It also comes from reflecting surfaces such as leaves or water. The  
77 polarization patterns of this light might change rapidly and unpredictably, especially as the  
78 orientation of reflecting surfaces changes with waves or wind. Most studies with regard to  
79 polarization sensitivity or polarization vision in air show utilization of this ability within three  
80 broad categories. First, polarization sensitivity is used to gain insights on compass  
81 directions. For example, insects such as bees, ants, and locusts exploit the polarization pattern of  
82 the sky for orientation and navigation (Fent, 1986; Mappes and Homberg, 2004; Rossel, 1993;  
83 Wehner and Müller, 2006). Second, polarization cues are used to recognize specific  
84 habitats. For example, water beetles and bugs use the polarization pattern of reflecting surfaces  
85 as a visual cue to find habitats (Schwind, 1984; Schwind, 1991), and insects such as mayflies,  
86 midges and dragonflies use the pattern to find water surfaces to use as their oviposition sites  
87 (Kriska et al., 2007; Kriska et al., 1998; Lerner et al., 2008; Wildermuth, 1998). Finally,  
88 polarization sensitivity is used for communication and mate recognition. Some animals have  
89 polarization-active body parts. For example, polarization-sensitive butterflies have been shown  
90 to use this visual cue for finding mates in the rain forest where there is little interference from  
91 other polarized light sources due to the dense vegetation (Sweeney et al., 2003).

92         Some animals are also known to use underwater polarization cues. Due to its higher  
93 refractive index, in water less polarized light is reflected from surfaces than in air. Instead,

94 almost all polarization emerges from the scattering of light in bulk media, resulting in  
95 polarization patterns that are more predictable but also more complex than those found in air.  
96 The complexity arises from factors such as the depth, the line of view, the elevation of the sun,  
97 the wavelength of the light, the visibility of the bottom, the proximity of the shore, and water as  
98 well as weather conditions (Ivanoff and Waterman, 1958; Novales Flamarique and Hawryshyn,  
99 1997; Waterman and Westell, 1956). However, it is precisely the predictability of polarization  
100 patterns that allows for exploitation of polarization sensitivity for orientation, contrast  
101 enhancement, and for using the polarization features of animals as reliable visual cues for  
102 communication or prey detection (Cronin, 2006; Shashar et al., 2011; Wehner and Labhart,  
103 2006).

104         Generally there is relatively poor visibility in water as compared to air. This is primarily  
105 because the contrast of any scenery is drastically decreased due to the scattering of light within  
106 the water. However, scattered light is mainly polarized horizontally, so that a vertical  
107 polarization filter can increase the overall contrast by filtering out the haze (Cronin and Marshall,  
108 2011; Johnsen et al., 2011; Lythgoe and Hemmings, 1967). Additionally, muscle tissue and  
109 other body structures can influence the polarization of light, leading to a visual cue that can be  
110 used to detect prey or enhance communication. Specifically, tissue might polarize unpolarized  
111 light, or depolarize or change the e-vector orientation of existing polarized light (Cronin et al.,  
112 2003; Johnsen et al., 2011; Sabbah and Shashar, 2006; Shashar et al., 2000). Such body parts  
113 can increase the visibility of prey to polarization-sensitive predators such as fish and  
114 cephalopods (Johnsen et al., 2011; Kamermans and Hawryshyn, 2011; Shashar et al., 2000;  
115 Shashar et al., 1998), or might be used for communication as suggested in cephalopods and  
116 mantis shrimps (Marshall et al., 1999; Shashar et al., 1996). Thus far, such use of polarization  
117 sensitivity has never been shown for any insect even though some, such as *T. marmoratus* and  
118 other predacious aquatic insects, clearly could benefit from such mechanisms.

119         *T. marmoratus* larvae are aquatic visually-guided predators native to the southwest  
120 United States (Larson et al., 2009). The larvae are found in shallow ponds and small slow-  
121 flowing streams (Evans and Hogue, 2006; Velasco and Millan, 1998) and tend to swim with their  
122 principal eyes directed approximately horizontally. Thus, the polarization patterns that are  
123 formed relatively close to the surface in the horizontal line of view should be most important. In  
124 this line of view the polarization of light can be primarily explained by the refractive angle of the

125 incident light. Additionally, it is influenced by weather and water conditions, the wavelength of  
126 the light, the albedo of a visible bottom, and the proximity to the shore (Ivanoff and Waterman,  
127 1958; Novales Flamarique and Hawryshyn, 1997; Waterman and Westell, 1956). Overall the  
128 percent polarization during the day might reach up to 40% and the e-vector of the polarized light  
129 during the day is approximately horizontal as long as the sun zenith angle is not too large  
130 (Novales Flamarique and Hawryshyn, 1997). In the presence of polarized light, zooplankton and  
131 many other small transparent organisms that possess polarization-active body parts are  
132 potentially more visible to a polarization-sensitive predator (Johnsen et al., 2011). For example,  
133 prey of *T. marmoratus* larvae, such as mosquito larvae, show clear polarization features (Stecher  
134 et al., 2010) which the larvae potentially could use as visual cues to better detect their prey, if  
135 adequate polarization sensitivity exists in the principal eyes of these larvae.

136 *T. marmoratus* larvae have 12 eyes, 6 on each side of the head. Four of these eyes (E1 &  
137 E2 on each side) are tubular and look directly forward (Fig. 1A). The larvae scan with these  
138 principal eyes by oscillating their heads dorso-ventrally as they approach potential prey  
139 (Buschbeck et al., 2007). The anatomy of the retinas of these principal eyes is unusual  
140 (Maksimovic et al., 2011; Mandapaka et al., 2006). The retinas are divided into distinct distal  
141 and proximal portions. The distal retina consists of at least 12 tiers of photoreceptor cells with  
142 rhabdomes that are oriented approximately perpendicular to the light path. The microvillar  
143 orientation of these cells is irregular (Stecher et al., 2010). The proximal retina lies directly  
144 beneath and contains photoreceptor cells, the rhabdomes of which are oriented parallel to the  
145 light path as illustrated in the schematic of Fig. 1A. Based on an ultrastructural study (Stecher et  
146 al., 2010), it has been suggested that the proximal retina could be polarization sensitive because  
147 it contains cell types that meet common key characteristics that leads to polarization sensitivity  
148 in invertebrates. Those include the presence of parallel microvilli within individual  
149 photoreceptors, perpendicular orientation of microvilli in neighboring photoreceptors, and the  
150 presence of identical spectral sensitivity (Wehner and Labhart, 2006). In *T. marmoratus* the  
151 proximal retina is composed of three cell types. Two of these types (T1 and T3) have a vertical  
152 (dorsoventral) and one (T2) has a horizontal (mediolateral) microvillar orientation (Fig.  
153 1B). Within the retina, the three types are situated in an alternating pattern so that cells with  
154 vertical microvillar orientation are adjacent to cells with horizontal microvillar orientation (Fig.  
155 1B). However, before light reaches the proximal retina, it first travels through the rhabdomeric

156 portion of the distal retina (Fig. 1A). Prior to this study, it was unclear if the polarization  
157 sensitivity might diverge from what was expected from the microvillar orientation, since  
158 rhabdomes potentially alter polarized light (Chiou et al., 2008).

159         Based on electrophysiological measurements of third instar larvae, we present data that  
160 clearly demonstrate that the proximal retina is indeed polarization sensitive. Our data show that  
161 two of the three cell types have relatively high polarization sensitivity and that the orientation of  
162 polarization sensitivity corresponds well with predictions from the anatomical data: T2 cells are  
163 most sensitive to horizontally polarized light and T1 cells are most sensitive to vertically  
164 polarized light.

165

## 166 **Material and Methods:**

### 167 **Animals**

168 *T. marmoratus* larvae were offspring of beetles provided by the Insectarium of the Cincinnati  
169 Zoo and Botanic Garden or of beetles collected between 2004 and 2012 near Tuscon, Az, USA.  
170 A population of *T. marmoratus* is maintained in our laboratory throughout the year. *T.*  
171 *marmoratus* larvae were reared in isolation on previously frozen bloodworms and live mosquito  
172 larvae. All data were obtained from third instar larvae, 3 – 5 days after ecdysis.

173

### 174 **Animal Preparation**

175 The larvae were anesthetized on ice and placed, head downward, onto a 35° slope so that the eye  
176 tubes of E1 and E2 were oriented approximately horizontally (Fig. 2). Apart from the head and  
177 the tip of the abdomen, larvae were immobilized in 2% agar gel. The head and mandibles were  
178 immobilized with dental wax (# 091-1578, Patterson, St. Paul, MN, USA). In some trials, to  
179 specifically target photoreceptors of E1 or E2, the excluded eye was occluded with opaque nail  
180 polish. The animal was positioned with its eyes 1 cm behind the polarization filter (Fig. 2).  
181 Apart from the tip of the abdomen, the animal was submerged in 50% insect ringer (O'Shea and  
182 Adams, 1981) containing 0.01% trypsin (Fisher Science Education, Hanover Park, IL, USA) or  
183 0.01% protease from *Streptomyces griseus* (Sigma-Aldrich Corp., St. Louis, MO, USA). The  
184 protease inhibited the coagulation of the hemolymph, which otherwise formed a gelatinous mass  
185 that made it difficult to advance the electrode. To gain access to the photoreceptors of E2, the  
186 lens of E6 was removed. To access the photoreceptors of E1, either the lens of E6 or E5 was

187 removed. Immediately thereafter a microelectrode was advanced into the tissue with a motorized  
188 manipulator, and from then on manipulations were performed under dim red light to which the  
189 photoreceptors showed no response. In total we recorded from 38 animals (14 E1 and 24 E2).  
190 While we most often only recorded from one cell per eye, in few instances we recorded from two  
191 cells: one most sensitive to vertical e-vector orientation and one most sensitive to horizontal e-  
192 vector orientation.

193

#### 194 **Intracellular recording and neurobiotin iontophoresis**

195 The electrophysiological setup was composed of standard equipment including an Axoclamp-2A  
196 amplifier with a HS-2A gain x1 headstage (Molecular Devices, Inc., Sunnyvale, CA, USA),  
197 iWorks AD board 118 (iWorks Systems, Inc., Dover, NH, USA), A-M systems audio monitor  
198 330 (A-M Systems, Inc., Sequim, WA, USA), and Tektronix 5103N oscilloscope (Tektronix,  
199 Inc., Beaverton, OR, USA), a vibration isolation platform (TMC-66-501, Technica  
200 Manufacturing Corporation, Peabody, MA, USA) and a faraday cage. A silver wire that was  
201 inserted into the insect ringer served as a reference electrode.

202 The experimental setup also included a UV transmissive polarization filter (BVO UV  
203 Polarizer RAW film, Bolder Vision Optics, Boulder, CO, USA) that was mounted onto a rotary  
204 optic mount (Edmund Optics, Barrington, NJ, USA). The light stimulus consisted of a UV LED  
205 with a peak wavelength of 383 nm and a half width of 10 nm (30 mW/15, RL5-UV0315-380,  
206 Super Bright LEDs, Inc., St. Louis, MO, USA) that was mounted onto a rotating arm. The LED's  
207 peak emission was close to the peak sensitivity of the photoreceptor cells of the proximal retina  
208 which were previously reported to be 375 nm with a half-width of 75 nm (Maksimovic et al.,  
209 2011). The LED was positioned a couple of millimeters behind the polarization filter. Both the  
210 polarization filter orientation as well as the stimulus position could be freely adjusted throughout  
211 the recording, as they were mechanically uncoupled from the vibration isolation table. The light  
212 intensity of the LED was controlled through the AD board with LabScribe2 (vs 2.301,  
213 iWorxSystems Inc.). The light intensity, measured with a cosine corrector (Ocean optics, Inc.,  
214 Dunedin, FL, USA), ranged from  $7.97 \times 10^{15}$  to  $1.18 \times 10^{19}$  photon/cm<sup>2</sup>/s at the position of the  
215 eye. The intensity was measured with a calibrated spectrometer (USB2000+ Ocean optics, Inc.,  
216 Dunedin, FL, USA).

217 To establish the response-stimulus intensity (V-logI) relationship, 20 ms light pulses

218 (with 2 second intervals) were presented for 12 light intensities over 3 log units. Driving the  
219 LED with the chosen voltages yielded stable and reproducible light intensities and a stable  
220 emission spectrum. Our LED stimulus tended to truncate the flatter upper and lower portions of  
221 the V-logI curve, however, all critical measurements, as well as the PS calculations, were  
222 performed within its confirmed linear range. A 20 ms stimulus yielded a clean response that did  
223 not overlap with the stimulus artifact. Intracellular recordings were performed with high  
224 impedance glass microelectrodes (A-M systems, Inc., Sequim, WA USA; catalog # 601000) with  
225 a resistance of 70 – 120 M $\Omega$ , which were pulled with a horizontal puller (Sutter Instrument Co.  
226 P97, Novato, CA, USA). The tips of the electrodes were filled with 2% neurobiotin in 3 M KCl  
227 (Vector Laboratories, Inc., Burlingame, CA, USA), and the remainder with 3M KCl (separated  
228 by a small air bubble).

229 After a photoreceptor cell was impaled, the stimulus was positioned to maximize the  
230 response. Measurements were only taken from cells with stable resting potentials and response  
231 strengths of at least 20 mV, even when the polarization filter was turned perpendicular to the  
232 optimal e-vector orientation. After successful recordings, cells were iontophoretically injected  
233 with neurobiotin for ~15 minutes by either passing a constant or pulsing current (150 ms, 2-3 nA  
234 pulses at 3 Hz). Thereafter, intact animals were placed in 50% insect ringer for 10-30 min at  
235 room temperature to allow neurobiotin to distribute throughout the cell. The data were recorded  
236 and stored, a moving average (10 points; 1ms) was calculated using LabScribe software  
237 (LabScribe2, version 2.301, iWorks Systems, Inc., Dover, NA, USA) and data were analyzed  
238 with customized MATLAB (The Math Works, Inc., Natick, MA, USA) programs. For each  
239 stimulus, the stimulus intensity was calculated from the average resting potential (over 200  $\mu$ s  
240 prior to the stimulus onset) and the maximum response.

241

### 242 **Optimal e-vector orientation**

243 Light intensities were chosen that likely fell in the linear range of the V- logI response curves.  
244 Stimulus intensities were slightly adjusted for individual cells. To determine how well each cell  
245 responded to polarized light of different orientation, the polarization filter was turned in 5 degree  
246 steps over 180 degrees. This was repeated up to 5 times per cell, and the e-vector direction for  
247 which a cell showed minimal and maximal responses was determined from these data. To  
248 achieve this, for each individual cell, the cycles were normalized to the maximum response



249 magnitude of the cell and fitted to a sinusoidal curve  $f(x) = a * \sin(b * x + c) + d$  using the  
250 `cftool()` function of MATLAB's curve fitting toolbox. The e-vector direction with respect to the  
251 head position (taken from frontal images of the head) that yielded minimum and maximum  
252 response was obtained from this fit. To visualize the response magnitude dependency on e-  
253 vector direction, for each cell, the response magnitudes were averaged and normalized  
254 (maximum = 1; minimum = 0). After rounding the e-vector directions to the nearest 5 degrees,  
255 the average of all cells was calculated.

256  
257

### 258 **Polarization sensitivity (PS)**

259 V-logI relationships were determined for e-vector orientations that yielded minimum responses  
260 (min V-logI), as well as to perpendicular e-vector directions (max V-logI). For each stimulus  
261 intensity the response was measured 3 - 5 times. For each cell the response magnitudes of both  
262 e-vector orientations were fit to the hyperbolic Naka-Rushton function (Menzel et al., 1986;  
263 Naka and Rushton, 1966; Skorupski et al., 2007),  $V = (I^n * V_{max}) / (I^n + K^n)$ , where V is the  
264 response magnitude in mV, I is the stimulus intensity and K is the stimulus intensity at  $V_{max}/2$   
265 (measured in photon/cm<sup>2</sup>/s). From this fit, the polarization sensitivity was calculated from the  
266 shift of the V- logI response curves at  $V_{max}/2$ . Specifically, polarization sensitivity is defined as  
267  $PS = 10^{\Delta i}$  where  $\Delta i$  is the difference in log I units between the two V-logI curves at K (Dacke et  
268 al., 2002; Kleinlogel and Marshall, 2006). To visualize the normalized V-logI curves (Fig. 6),  
269 we first determined the maximum and minimum responses of the max V-logI of each cell.  
270 Subsequently, max V-logI and min V-logI curves were normalized to these values (max=1;  
271 min=0). Cells of E1 (Fig. 6a & b) and E2 (Fig 6c & d) were considered separately.

272 In order to visualize relative response differences between cell types (Fig. 7), we pooled  
273 data from E1 and E2 for cells for which we had V-logI curves and therefore could confirm that  
274 measurements were indeed within the linear range of these curves. To normalize measurements  
275 without affecting the magnitude of the modulation, for each data point we calculated the  
276 difference to the maximum response magnitude of the cell ( $\Delta$  to max response in mV).

277

### 278 **Histology**

279 After completion of the recordings and injection of neurobiotin, the animal was decapitated and

280 processed as previously described (Maksimovic et al., 2011). In brief, animals were fixed in 4%  
281 paraformaldehyde solution (Electron Microscopy Sciences, Hatfield, PA, USA) in 0.2 M  
282 Sorensen's buffer (Electron Microscopy Sciences, Hatfield, PA, USA) for 14 to 16h at 4°C.  
283 After thorough washing in Sorensen's buffer the tissue was dehydrated, washed in propylene  
284 oxide for ~15 min to improve penetration, and rehydrated. Subsequently, the tissue was  
285 incubated with streptavidin conjugated with Alexa Fluor 568 (Life Technologies Corporation,  
286 Carlsbad, CA, USA) diluted 1:200 (working concentration 0.5 µg/ml) in Sorensen's buffer with  
287 1% Triton X-100 for 14-16h at RT, washed, dehydrated and embedded in Ultra-Low Viscosity  
288 Embedding Medium (Polysciences, Warrington, PA, USA). Finally, the tissue was serially  
289 sectioned at 15 µm, mounted and imaged with an Olympus 60806 digital camera (Olympus  
290 America Inc., Center Valley, PA, USA) or a Zeiss LSM 510 laser scanning confocal microscope  
291 (Carl Zeiss AG, Oberkochen, Germany). For transmission electron microscopy, tissue was  
292 processed as described by Wolff (Wolff, 2011), with the following modifications: Sorensen's  
293 buffer was used instead of sodium cacodylate, the heads were incubated in the fixative in the  
294 refrigerator overnight, and tissue was embedded in Ultra-Low Viscosity Embedding Medium.  
295 Ultrathin sections of the proximal retina were taken with an Ultracut E Microtome (Reichert-  
296 Jung), visualized with a transmission electron microscope (JOEL JEM-1230) and digital images  
297 were taken with a Megaplus ES 4.0 camera. The brightness and contrast of all final images was  
298 adjusted with Adobe Photoshop CS3 (Adobe Systems Incorporated, San Jose, CA, USA).

299

## 300 **Results**

301

302 Based on transmission electron microscopy, the proximal retina of the principal eyes of first  
303 instar larvae of *T. marmoratus* is composed of three distinct cell types (Stecher et al., 2010). To  
304 evaluate if a similar organization also exists in third instar larvae, we first examined ultrathin  
305 sections of both principal eyes. As illustrated for E2 in Figure 3a, this indeed is the case: three  
306 distinct cell types are discernable. T1 and T2 are somewhat larger, and have vertically and  
307 horizontally aligned microvilli, respectively. T3 is organized similarly to T1, but its rhabdomeric  
308 portion is much smaller. Next, we used intracellular recordings to measure the polarization  
309 sensitivity of individual proximal photoreceptors. We found two physiologically distinct cell  
310 types in both eyes: one is most sensitive to horizontally polarized light, and the other is most

311 sensitive to vertically polarized light. Comparable data were obtained for E1 and E2.  
312 Neurobiotin staining allowed us to link our physiological findings to two (T1 and T2) of the  
313 three anatomically distinct cell types (Table 1). In many cases multiple cells were stained,  
314 making it impossible to identify the cell that was recorded from. In some cases such staining  
315 was used to confirm the eye from which we recorded. If only one cell was stained, without  
316 exception, this was cell type T2 for cells most sensitive to horizontally polarized light (see Figure  
317 3b for example) and T1 for cells that were most sensitive to vertically polarized light (see Figure  
318 3c for example). Although there is some indication in the physiological data that we may have  
319 recorded from two different populations of cells that are most sensitive to vertically polarized  
320 light (see below), none of the stained cells were of cell type T3.

321

### 322 **Response to changing e-vector orientation**

323 An example of a recording from a cell that was most sensitive to horizontally polarized  
324 light is illustrated in Figure 4. The cell's response is modulated by about 44% while the e-vector  
325 orientation is rotated through  $180^\circ$  (Fig 4a). In addition the shape of individual voltage  
326 responses was slightly different between recordings. Specifically, a cell's maximum response  
327 was characterized by a fast initial peak, followed by a slightly slower maximum (Fig 4b) similar  
328 to what has been reported in sawflies (Meyer-Rochow, 1974). Weaker responses did not show  
329 the fast initial peak (Fig 4c). To visualize the response magnitude modulation (Fig. 5), the data  
330 were normalized and averaged. Three cells that showed a maximum and minimum response to  
331 e-vector orientations that deviated by more than 3 standard deviations from the average were  
332 excluded from this and further analysis. These outliers likely were the result of tissue distortion  
333 from excessive gut movement that sometimes occurs during recordings.

334 On average, cells that were most sensitive to horizontally polarized light had a maximum  
335 response to polarized light with an e-vector direction of  $182.2^\circ$  ( $\pm 5.2$  s.d.,  $n = 6$ ) in E1 (Fig. 5a)  
336 and  $181.9^\circ$  ( $\pm 6.3$  s.d.,  $n = 11$ ) in E2 (Fig. 5b) and a minimum response to polarized light with an  
337 e-vector direction of  $271^\circ$  ( $\pm 6.5$  s.d.,  $n = 6$ ) in E1 and  $268.7^\circ$  ( $\pm 7.4$  s.d.,  $n = 11$ ) in E2. There  
338 was no significant difference between measurements from E1 and E2 (two tailed Student's t-test,  
339 min response  $p = 0.539$ , max response  $p = 0.957$ ).

340 Cells most sensitive to vertically polarized light had a maximum response to an e-vector  
341 direction of  $268.5^\circ$  ( $\pm 5.7$  s.d.,  $n = 8$ ) in E1 (Fig. 5a) and  $269.2^\circ$  ( $\pm 4.3$  s.d.,  $n = 12$ ) in E2 (Fig.

342 5b), and a minimum response to an e-vector direction of  $179.6^\circ$  ( $\pm 6.8$  s.d.,  $n = 8$ ) in E1 and  
343  $178.3^\circ$  ( $\pm 5.4$  s.d.,  $n = 12$ ) in E2. No significant difference between the two eyes was observed  
344 (two tailed Student's t-test, min response  $p = 0.642$ , max response  $p = 0.769$ ).

345

### 346 **Polarization sensitivity (PS) measurements**

347 Trials were excluded when they a) had an unstable baseline (3 recordings) or b) the response  
348 magnitude could not be recovered to within 10% of the initial response (3 recordings). Figure 6  
349 illustrates (separately for E1 and E2) the average of the normalized V-logI curves of cells most  
350 sensitive to horizontally and vertically polarized light. Normalized V-logI curves are illustrated  
351 for both maximum (max V-logI) and minimum (min V-logI) response e-vector orientations. To  
352 calculate the polarization sensitivity we first measured the V-logI relationship for each cell at the  
353 maximal and minimal sensitive e-vector orientation (Fig. 6a-d). However, at the time of the  
354 recordings no exact measurements of these directions were available. Therefore they were  
355 estimated by slowly turning the polarization filter while observing the response magnitude.  
356 These estimations were on average within 5.2 degrees ( $\pm 4.9$  s.d.,  $n = 30$ ) of the measured value  
357 (based on subsequent data analysis). This small diversion from the optimal angle likely leads to  
358 a small underestimate of the polarization sensitivity for some of the cells.

359 The polarization sensitivity was calculated from the shift of the V-logI curves along the  
360 intensity axis (Fig. 6a). The range of PS values, especially for the cells that were most sensitive  
361 to vertically polarized light (of both eyes), was very large (as illustrated in Fig. 6e,f). Cells of E1,  
362 which were most sensitive to vertically polarized light, had a PS of  $11.1$  ( $\pm 8.2$  s.d.,  $n = 7$ ) and  
363 cells that were most sensitive to horizontally polarized light had a PS of  $8.8$  ( $\pm 3.2$  s.d.,  $n = 5$ ).  
364 For E2 the PS of cells most sensitive to vertically polarized light was  $12.2$  ( $\pm 8.0$  s.d.,  $n = 13$ ),  
365 and of those most sensitive to horizontally polarized light the PS was  $9.5$  ( $\pm 3.4$  s.d.,  $n = 9$ ).  
366 From these data we could detect neither a significant difference in PS levels between eyes, nor  
367 between cells that were most sensitive to vertically or horizontally polarized light within each  
368 eye (Student's t-test,  $p > 0.05$ ).

369

### 370 **Discussion**

371 Although polarization sensitivity has been studied fairly well in adult insects, little is known

372 about it in larvae. Nevertheless, it is likely that at least some larvae, such as those of *T.*  
373 *marmoratus*, could substantially benefit from it. In previous work, the possibility of polarization  
374 sensitivity in these larvae has been raised based on the ultrastructure of their eyes (Stecher et al.,  
375 2010). Here we used electrophysiological methods to confirm that the proximal retinas of the  
376 principal eyes E1 and E2 are indeed polarization sensitive. As expected from the ultrastructure,  
377 cells of the type T1 are most sensitive to vertically polarized light while cells of the type T2 are  
378 most sensitive to horizontally polarized light.

379

### 380 *Polarization sensitivity in arthropods*

381 To the best of our knowledge there has only been one other physiological study (Meyer-Rochow,  
382 1974) of polarization sensitivity within holometabolous insect larvae. In that study the PS values  
383 of the sawfly larval eye had a mean of 6.1 with a maximum of 10. Much more is known about  
384 polarization sensitivity in adult insects and crustaceans. For the former, the highest PS values  
385 generally are found in the dorsal rim area, an area of the compound eye that is known to be  
386 specialized for polarization vision.

387           The PS values of *T. marmoratus* larvae are comparable to values commonly  
388 found in the dorsal rim area (for example, those of crickets, locust, and ants; Table 2).  
389 Moreover, they are clearly higher than the typically low PS values found in other areas of insect  
390 eyes. Specifically, our values are most similar to those of bees, scarab beetles, and some flies  
391 (*Musca*, *Calliphora*). Similarly, when compared to crustaceans, our values are similar to the  
392 higher PS values in the literature. In some of these species behavioral relevance has been  
393 demonstrated (Chiou et al., 2008). Taken together, these comparisons make clear it that PS  
394 values in the visual system of *T. marmoratus* larval eyes are fairly high, making it likely that  
395 polarization sensitivity plays an important role for them.

396           PS values often are quite variable in invertebrates (Stowe, 1983). Correspondingly, the  
397 range of the measured PS values in *T. marmoratus* was large, ranging from 4.5 to 14.2 for cells  
398 most sensitive to horizontal e-vector orientation, and from 2.7 to 24.9 for cells most sensitive to  
399 vertical e-vector orientation. Some, but likely not all of the variability might be due to  
400 measurement inaccuracies (Stowe, 1983). Another previously discussed source of the typically  
401 large range in PS values is natural variability in microvillar orientation, as well as distortions that  
402 might be caused by the microelectrode penetration. Nilsson et al. (1987) modeled the effects of

403 microvillar misalignment on PS values and found that relatively minor misalignments can  
404 strongly affect PS values. In addition, in fused rhabdomes neighboring cells can act as lateral  
405 filters for one another, adding further variability (Nilsson et al., 1987; Shaw, 1969; Stowe, 1983).

406 In addition to sensitivity to linearly polarized light, animals can be sensitive to circularly  
407 polarized light. In the mantis shrimp compound eye distally situated photoreceptors act as a  
408 retarder that converts circularly polarized light into linearly polarized light (and vice versa),  
409 allowing them to be sensitive to circularly polarized light instead of linearly polarized light  
410 (Chiou et al., 2008). In E1 and E2 of *T. marmoratus*, light that enters the polarization sensitive  
411 proximal retina also first has to cross the microvilli of distally situated photoreceptor cells (Fig.  
412 1A), an organization that potentially could alter the incoming light. However, in contrast to the  
413 mantis shrimp organization, the microvilli of the distally located photoreceptor cells of *T.*  
414 *marmoratus* are relatively irregular (Stecher et al., 2010). Moreover, cells typically are most  
415 sensitive to either linearly or circularly polarized light (Chiou et al., 2008). Therefore it is  
416 unlikely that T1-T3 cells are sensitive to circularly polarized light, though we did not directly test  
417 for this possibility.

418 Although PS values generally are highly variable, the range of values for those cells that  
419 were most sensitive to vertical e-vector orientations was particularly large. In the next section  
420 we discuss evidence that this may be due to the presence of two distinct groups of cells.

#### 421 422 *Evidence for two cell types that are sensitive to vertically polarized light*

423 The proximal retina is composed of three cell types (T1, T2 and T3) that are arranged in an  
424 alternating pattern (Fig. 1b). All three cell types have the same spectral sensitivity in the UV  
425 range (Maksimovic et al., 2011), there is no obvious optical barrier between cells, and the  
426 microvilli are directly adjacent. Based on our transmission electron micrographs (Figure 3a), in  
427 third instar larvae two of these cells (T1 and T3) have microvilli that are oriented vertically,  
428 whereas only one cell type (T2) has microvilli that are oriented horizontally. From post-  
429 recording staining of cells we could confirm that, as expected from their microvillar orientation,  
430 T2 cells indeed are most sensitive to horizontally polarized light, and that T1 cells are also most  
431 sensitive to vertically polarized light. However, we were not successful in staining any of the  
432 much smaller T3 cells. Considering that post recording injection of neurobiotin only succeeded  
433 in single cell staining in less than 1/3 of the experiments, it is conceivable that some of our

434 physiology data are nevertheless from T3 cells. Based on the confirmed directional sensitivity of  
435 the T1 cells and the more or less identical microvillar orientation of T3, it is highly likely that  
436 these cells too are most sensitive to vertically polarized light. However, the large structural  
437 difference between these cells (including the sizes of adjacent rhabdomeres) could result in  
438 differences in PS values. As modeled by Nilsson et al. (Nilsson et al., 1987), an unequal light  
439 absorbance ratio between neighboring cells (that act as lateral filters for one another) leads to  
440 different modulation strengths and hence unequal PS values for these cells. Specifically, the  
441 model shows that a cell with a relatively large rhabdomere, next to a cell with a smaller,  
442 orthogonal rhabdomere would result in less modulation and lower PS values. Conversely, the  
443 cell with the smaller rhabdomere is expected to have increased modulation and a higher PS  
444 value. As is apparent in Fig 3a, the rhabdomere of T3 cells (labeled MT3) indeed might be  
445 surrounded by very small T2 cell rhabdomeres (MT2). Accordingly, from the anatomy it might  
446 be expected that T3 cells have relatively low PS values.

447 Based on our combined physiological data, cells most sensitive to vertical e-vectors  
448 appear to fall into two distinct populations (Fig. 7): one showing shallower modulation (lower  $\Delta$   
449 response magnitude) than does the other group of cells, some of which have been identified as  
450 T1 cells. In addition when we recalculated the average PS values according to these groupings,  
451 we found that the PS values of the cells most sensitive to horizontal ( $9.3 \pm 3.2$  s.d.,  $n = 14$ ) e-  
452 vector orientations tend to fall in-between the values of the low ( $3.1 \pm 0.4$  s.d.,  $n = 4$ ) and high  
453 ( $13.9 \pm 7.5$  s.d.,  $n = 16$ ) modulated cells most sensitive to vertical e-vector orientations. The  
454 shallower population potentially could represent T3 cells. No separation into two groups could  
455 be observed for cells most sensitive to horizontally polarized light, neither anatomically nor  
456 based on physiology. Interestingly though, the shape of the polarization modulation for all cells,  
457 with a broadened range around the peak and a narrow range around the trough, corresponded  
458 well with theoretical curves (Nilsson et al., 1987).

459 Despite the relatively large literature on polarization sensitivity, few studies have  
460 evaluated the modulation strength of neighboring cells in the light of rhabdomere anatomy. The  
461 unequal rhabdomere organization of *T. marmoratus* makes it well suited to test existing  
462 theoretical models, and we are excited that our data are conceptually consistent with theoretical  
463 considerations (Nilsson et al., 1987). It would be interesting to empirically investigate the  
464 reciprocal influence of neighboring cells in greater depth by examining other comparable

465 systems.

466

#### 467 *Functional considerations*

468         The high polarization sensitivity makes it likely that polarized light plays an important  
469 role in *T. marmoratus*' vision. The larval eyes nearly completely degenerate during pupation  
470 while the adult compound eye develops de novo (Sbita et al., 2007). Thus, the polarization  
471 sensitivity of the larval eyes can only benefit their vision in the larval phase. In order to discuss  
472 possible functions, we need to first consider these beetle larvae's natural history and behavior.  
473 They are highly successful visual predators: once a prey item is detected, they stalk and follow it  
474 using their principal eyes E1 and E2. While slowly approaching the prey, larvae scan their visual  
475 field with dorso-ventral head movements and finally strike to catch the prey (Buschbeck et al.,  
476 2007). It has been shown in other aquatic animals that polarization sensitivity can be used to  
477 either enhance visual contrast by filtering out horizontally polarized haze, or to use its prey's  
478 polarization features for detection (Shashar et al., 1998). It is conceivable that polarization  
479 sensitivity in *T. marmoratus* has similar functions. However, there are other ways in which  
480 polarization sensitivity could be beneficial. For example, *T. marmoratus* embryos develop on  
481 land, near water. After hatching young larvae need to find the nearby water, a behavior for  
482 which the use of polarization cues has been demonstrated in a variety of insects (Schwind, 1991;  
483 Schwind, 1999). Moreover, late instar *T. marmoratus* larvae need to return to land to pupate and  
484 therefore need to find the shore. Within a pond, horizontal background polarization is expected  
485 to be highest away from the shore, and it has been shown that such cues can be used to find open  
486 water (Schwind, 1999). It is conceivable that *T. marmoratus* uses similar visual cues for the  
487 opposite purpose, namely to find shore when it is time to pupate. Behavioral experiments will be  
488 necessary to determine for which of these behaviors polarization sensitivity might be important.

489

490

#### 491 **List of Abbreviations**

492 E1,2 – Eye one and two

493 PS – polarization sensitivity

494

#### 495 **Acknowledgements**



496 We thank Dr. Ilya Vilinsky and the Buschbeck and Layne lab groups for helpful discussion, Dr.  
497 John E. Layne for lending us his rotating arm, and Marisano J. James for help in editing the  
498 manuscript. Shannon Werner assisted in beetle care and Randy Morgan and the Cincinnati Zoo  
499 & Botanical Garden provided Sunburst Diving Beetles.

500

501 **Funding**

502 This work was supported by the National Science Foundation under grants IOS0545978 and  
503 IOS1050754 and a University Research Council summer graduate fellowship to AS.

504

505 **References**

506

507 **Bartsch, K.** (1995). Polarization-sensitive photoreceptors of different spectral types in  
508 the compound eye of waterstriders. *Naturwissenschaften* **82**, 292-293.

509 **Baylor, E. R. and Smith, F. E.** (1953). The orientation of Cladocera to polarized light.  
510 *The American Naturalist* **87**, 97-101.

511 **Blum, M. and Labhart, T.** (2000). Photoreceptor visual fields, ommatidial array, and  
512 receptor axon projections in the polarisation-sensitive dorsal rim area of the cricket compound  
513 eye. *J. Comp. Physiol. A* **186**, 119-128.

514 **Buschbeck, E. K., Sbita, S. J. and Morgan, R. C.** (2007). Scanning behavior by larvae  
515 of the predacious diving beetle, *Thermonectus marmoratus* (Coleoptera : Dytiscidae) enlarges  
516 visual field prior to prey capture. *J. Comp. Physiol. A* **193**, 973-982.

517 **Chiou, T.-H., Kleinlogel, S., Cronin, T., Caldwell, R., Loeffler, B., Siddiqi, A.,**  
518 **Goldizen, A. and Marshall, J.** (2008). Circular polarization vision in a stomatopod crustacean.  
519 *Current Biology* **18**, 429-434.

520 **Cronin, T. W.** (2006). Invertebrate vision in water. In *Invertebrate Vision*, eds. E. J.  
521 Warrant and D.-E. Nilsson, pp. 291 - 348. Cambridge: Cambridge University Press

522 **Cronin, T. W. and Marshall, J.** (2011). Patterns and properties of polarized light in air  
523 and water. *Phil. Trans. R. Soc. B* **366**, 619-626.

524 **Cronin, T. W., Shashar, N., Caldwell, R. L., Marshall, J., Cheroske, A. G. and**  
525 **Chiou, T.-H.** (2003). Polarization vision and its role in biological signaling. *Integrative and*  
526 *Comparative Biology* **43**, 549-558.

527 **Dacke, M., Byrne, M. J., Scholtz, C. H. and Warrant, E. J.** (2004). Lunar orientation  
528 in a beetle. *Proceedings of the Royal Society B* **271**, 361-365.

529 **Dacke, M., Nordström, P., Scholtz, C. and Warrant, E.** (2002). A specialized dorsal  
530 rim area for polarized light detection in the compound eye of the scarab beetle *Pachysoma*  
531 *striatum*. *J. Comp. Physiol. A* **188**, 211-216.

532 **Doane, C. C. and Leonard, D. E.** (1975). Orientation and dispersal of late-stage larvae  
533 of *Porthetria dispar* (Lepidoptera: Lymantriidae) *The Canadian Entomologist* **107**, 1333-1338.

534 **Doujak, F. E.** (1984). Electrophysiological measurement of photoreceptor membrane  
535 dichroism and polarization sensitivity in a Grapsid crab. *J. Comp. Physiol. A* **154**, 597-605.

- 536           **Evans, A. V. and Hogue, J. N.** (2006). Field guide to beetles of California. Berkeley:  
537 University of California Press.
- 538           **Fent, K.** (1986). Polarized skylight orientation in the desert ant *Cataglyphis*. *J. Comp.*  
539 *Physiol. A* **158**, 145-150.
- 540           **Gilbert, C.** (1994). Form and function of stemmata in larvae of holometabolous insects.  
541 *Annual Review of Entomology* **39**, 323-349.
- 542           **Glantz, R.** (2007). The distribution of polarization sensitivity in the crayfish retinula. *J.*  
543 *Comp. Physiol. A* **193**, 893-901.
- 544           **Greiner, B., Cronin, T., Ribi, W., Wcislo, W. and Warrant, E.** (2007). Anatomical  
545 and physiological evidence for polarisation vision in the nocturnal bee *Megalopta genalis*. *J.*  
546 *Comp. Physiol. A* **193**, 591-600.
- 547           **Hardie, R. C.** (1984). Properties of photoreceptors R7 and R8 in dorsal marginal  
548 ommatidia in the compound eyes *Musca* and *Calliphora*. *J. Comp. Physiol. A* **154**, 157-165.
- 549           **Horváth, G. and Varjú, D.** (2004). Polarized light in animal vision : polarization  
550 patterns in nature. Berlin; New York: Springer.
- 551           **Ivanoff, A. and Waterman, T. H.** (1958). Factors, mainly depth and wavelength,  
552 affecting the degree of underwater light polarization. *Journal of marine research* **16**, 283 - 307.
- 553           **Johnsen, S., Marshall, N. J. and Widder, E. A.** (2011). Polarization sensitivity as a  
554 contrast enhancer in pelagic predators: lessons from in situ polarization imaging of transparent  
555 zooplankton. *Phil. Trans. R. Soc. B* **366**, 655-670.
- 556           **Kamermans, M. and Hawryshyn, C.** (2011). Teleost polarization vision: how it might  
557 work and what it might be good for. *Phil. Trans. R. Soc. B* **366**, 742-756.
- 558           **Kleinlogel, S. and Marshall, N.** (2009). Ultraviolet polarisation sensitivity in the  
559 stomatopod crustacean *Odontodactylus scyllarus*. *J. Comp. Physiol. A* **195**, 1153-1162.
- 560           **Kleinlogel, S. and Marshall, N. J.** (2006). Electrophysiological evidence for linear  
561 polarization sensitivity in the compound eyes of the stomatopod crustacean *Gonodactylus*  
562 *chiragra*. *Journal of Experimental Biology* **209**, 4262-4272.
- 563           **Kriska, G., Bernáth, B. and Horváth, G.** (2007). Positive polarotaxis in a mayfly that  
564 never leaves the water surface: polarotactic water detection in *Palingenia longicauda*  
565 (Ephemeroptera). *Naturwissenschaften* **94**, 148-154.
- 566           **Kriska, G., Horváth, G. and Andrikovics, S.** (1998). Why do mayflies lay their eggs en

567 masse on dry asphalt roads? Water-imitating polarized light reflected from asphalt attracts  
568 Ephemeroptera. *Journal of Experimental Biology* **201**, 2273-86.

569 **Labhart, T.** (1980). Specialized photoreceptors at the dorsal rim of the honeybee's  
570 compound eye: Polarizational and angular sensitivity. *J. Comp. Physiol. A* **141**, 19-30.

571 **Labhart, T.** (1986). The electrophysiology of photoreceptors in different eye regions of  
572 the desert ant *Cataglyphis bicolor*. *J. Comp. Physiol. A* **158**, 1-7.

573 **Labhart, T., Hodel, B. and Valenzuela, I.** (1984). The physiology of the cricket's  
574 compound eye with particular reference to the anatomically specialized dorsal rim area. *J. Comp.*  
575 *Physiol. A* **155**, 289-296.

576 **Larson, D. J., Alarie, Y., Roughley, R. E. and Nilsson, A. N.** (2009). Predaceous  
577 Diving Beetles (Coleoptera: Dytiscidae) of the Nearctic Region, with Emphasis on the Fauna of  
578 Canada and Alaska. *Annals of the Entomological Society of America* **94**, 769-770.

579 **Lerner, A., Meltser, N., Sapir, N., Erlick, C., Shashar, N. and Broza, M.** (2008).  
580 Reflected polarization guides chironomid females to oviposition sites. *Journal of Experimental*  
581 *Biology* **211**, 3536-3543.

582 **Lythgoe, J. N. and Hemmings, C. C.** (1967). Polarized light and underwater vision.  
583 *Nature* **213**, 893-894.

584 **Maksimovic, S., Layne, J. E. and Buschbeck, E. K.** (2011). Spectral sensitivity of the  
585 principal eyes of sunburst diving beetle, *Thermonectus marmoratus* (Coleoptera: Dytiscidae),  
586 larvae. *The Journal of Experimental Biology* **214**, 3524-3531.

587 **Mandapaka, K., Morgan, R. C. and Buschbeck, E. K.** (2006). Twenty-eight retinas  
588 but only twelve eyes: An anatomical analysis of the larval visual system of the diving beetle  
589 *Thermonectus marmoratus* (Coleoptera : Dytiscidae). *Journal of Comparative Neurology* **497**,  
590 166-181.

591 **Mappes, M. and Homberg, U.** (2004). Behavioral analysis of polarization vision in  
592 tethered flying locusts. *J. Comp. Physiol. A* **190**, 61-68.

593 **Marshall, J., Cronin, T. W., Shashar, N. and Land, M.** (1999). Behavioural evidence  
594 for polarisation vision in stomatopods reveals a potential channel for communication. *Current*  
595 *Biology* **9**, 755-758.

596 **Menzel, R., Ventura, D. F., Hertel, H., de Souza, J. M. and Greggers, U.** (1986).  
597 Spectral sensitivity of photoreceptors in insect compound eyes: Comparison of species and

598 methods. *J. Comp. Physiol. A* **158**, 165-177.

599 **Meyer-Rochow, V. B.** (1974). Structure and Function of the Larval Eye of the Sawfly,  
600 *Perga*. *J. Insect Physiol.* **20**, 1565 - 1591.

601 **Mote, M. I.** (1974). Polarization sensitivity. A phenomenon independent of stimulus  
602 intensity or state of adaptation in reticular cells of the crabs *Carcinus* and *Callinectes*. *J. Comp.*  
603 *Physiol. A* **90**, 389-403.

604 **Naka, K. I. and Rushton, W. A. H.** (1966). An attempt to analyse colour reception by  
605 electrophysiology. *Journal of Physiology* **185**, 556-586.

606 **Nilsson, D. E., Labhart, T. and Meyer, E.** (1987). Photoreceptor design and optical  
607 properties affecting polarization sensitivity in ants and crickets. *J. Comp. Physiol. A* **161**, 645-  
608 658.

609 **Novales Flamarique, I. and Hawryshyn, C. W.** (1997). Is the Use of Underwater  
610 Polarized Light by Fish Restricted to Crepuscular Time Periods? *Vision Research* **37**, 975-989.

611 **O'Shea, M. and Adams, M. E.** (1981). Pentapeptide (Proctolin) Associated with an  
612 Identified Neuron. *Science* **213**, 567-569.

613 **Rossel, S.** (1993). Navigation by bees using polarized skylight. *Comparative*  
614 *Biochemistry and Physiology Part A* **104**, 695-708.

615 **Sabbah, S. and Shashar, N.** (2006). Polarization contrast of zooplankton: A model for  
616 polarization-based sighting distance. *Vision Research* **46**, 444-456.

617 **Sbita, S. J., Morgan, R. C. and Buschbeck, E. K.** (2007). Eye and optic lobe  
618 metamorphosis in the sunburst diving beetle, *Thermonectus marmoratus* (Coleoptera :  
619 Dytiscidae). *Arthropod Structure & Development* **36**, 449-462.

620 **Schneider, L. and Langer, H.** (1969). Die Struktur des Rhabdoms im "Doppelaug" des  
621 Wasserläufers *Gerris lacustris*. *Cell Tissue Research* **99**, 538-559.

622 **Schwind, R.** (1984). The plunge reaction of the backswimmer *Notonecta glauca*. *J.*  
623 *Comp. Physiol. A* **155**, 319-321.

624 **Schwind, R.** (1991). Polarization vision in water insects and insects living on a moist  
625 substrate. *J. Comp. Physiol. A* **169**, 531-540.

626 **Schwind, R.** (1999). *Daphnia pulex* swims towards the most strongly polarized light - a  
627 response that leads to 'shore flight'. *Journal of Experimental Biology* **202**, 3631-3635.

628 **Shashar, N., Hagan, R., Boal, J. G. and Hanlon, R. T.** (2000). Cuttlefish use

629 polarization sensitivity in predation on silvery fish. *Vision Research* **40**, 71-75.

630 **Shashar, N., Hanlon, R. T. and Petz, A. deM.** (1998). Polarization vision helps detect  
631 transparent prey. *Nature* **393**, 222-223.

632 **Shashar, N., Johnsen, S., Lerner, A., Sabbah, S., Chiao, C.-C., Mäthger, L. M. and**  
633 **Hanlon, R. T.** (2011). Underwater linear polarization: physical limitations to biological  
634 functions. *Phil. Trans. R. Soc. B* **366**, 649-654.

635 **Shashar, N., Rutledge, P. and Cronin, T.** (1996). Polarization vision in cuttlefish - a  
636 concealed communication channel? *Journal of Experimental Biology* **199**, 2077-84.

637 **Shaw, S. R.** (1969). Sense-cell structure and interspecies comparisons of polarized-light  
638 absorption in arthropod compound eyes. *Vision Research* **9**, 1031-1040.

639 **Skorupski, P., Döring, T. and Chittka, L.** (2007). Photoreceptor spectral sensitivity in  
640 island and mainland populations of the bumblebee, *Bombus terrestris*. *J. Comp. Physiol. A* **193**,  
641 485-494.

642 **Stecher, N., Morgan, R. and Buschbeck, E.** (2010). Retinal ultrastructure may mediate  
643 polarization sensitivity in larvae of the Sunburst diving beetle, *Thermonectus marmoratus*  
644 (Coleoptera: Dytiscidae). *Zoomorphology* **129**, 141-152.

645 **Stowe, S.** (1980). Spectral sensitivity and retinal pigment movement in the crab  
646 *Leptograpsus variegatus* (Fabricius). *Journal of Experimental Biology* **87**, 73-98.

647 **Stowe, S.** (1983). A theoretical explanation of intensity-independent variation of  
648 polarisation sensitivity in Crustacean retinula cells. *J. Comp. Physiol. A* **153**, 435-441.

649 **Sullivan, C. R. and Wellington, W. G.** (1953). The light reactions of larvae of the Tent  
650 caterpillars, *Malacosoma disstria* (Hbn.), *M. americanum* (Fab.), and *M. pluviale* (Dyar).  
651 (Lepidoptera: Lasiocampidae). *The Canadian Entomologist* **85**, 297-310.

652 **Sweeney, A., Jiggins, C. and Johnsen, S.** (2003). Insect communication: Polarized light  
653 as a butterfly mating signal. *Nature* **423**, 31-32.

654 **Trujillo-Cenóz, O. and Bernard, G. D.** (1972). Some aspects of the retinal organization  
655 of *Sympycnus lineatus* Loew (Diptera, dolichopodidae). *Journal of Ultrastructure Research* **38**,  
656 149-160.

657 **Velasco, J. and Millan, A.** (1998). Feeding habits of two large insects from a desert  
658 stream: *Abedus herberti* (Hemiptera : Belostomatidae) and *Thermonectus marmoratus*  
659 (Coleoptera : Dytiscidae). *Aquatic Insects* **20**, 85-96.

660           **Waterman, T. H. and Westell, W. E.** (1956). Quantitative effect of the sun's position on  
661 submarine light polarization. *Journal of marine research* **15**, 149 - 169.

662           **Wehner, R.** (2001). Polarization vision - a uniform sensory capacity? *Journal of*  
663 *Experimental Biology* **204**, 2589-2596.

664           **Wehner, R. and Labhart, T.** (2006). Polarisation vision. In *Invertebrate Vision*, eds. E.  
665 J. Warrant and D.-E. Nilsson, pp. 291 - 348. Cambridge: Cambridge University Press

666           **Wehner, R. and Müller, M.** (2006). The significance of direct sunlight and polarized  
667 skylight in the ant's celestial system of navigation. *Proceedings of the National Academy of*  
668 *Sciences* **103**, 12575-12579.

669           **Wellington, W. G.** (1955). Solar heat and plane polarized light versus the light compass  
670 reaction in the orientation of insects on the ground. *Annals of the Entomological Society of*  
671 *America* **48**, 67-76.

672           **Wellington, W. G., Sullivan, C. R. and Green, G. W.** (1951). Polarized light and body  
673 temperature level as orientation factors in the light reactions of some Hymenopterous and  
674 Lepidopterous larvae. *Canadian Journal of Zoology* **29**, 339-351.

675           **Wildermuth, H.** (1998). Dragonflies recognize the water of rendezvous and oviposition  
676 sites by horizontally polarized light: a behavioural field test. *Naturwissenschaften* **85**, 297-302.

677           **Wolff, T.** (2011). Preparation of Drosophila Eye Specimens for Transmission Electron  
678 Microscopy. *Cold Spring Harbor Protocols* **2011**, 1385-1388.

679  
680  
681

682 Fig. 1. Schematic of the principal eye's structure of *T. marmoratus larvae*. A. Horizontal (a) and  
683 sagittal (b) schematic of Eye 2 (E2) indicating the position of the distal (DR) and proximal (PR)  
684 retinas. The white line marks the approximate position of B. B. Microstructure of the proximal  
685 retina, containing three photoreceptor types T1, T2, and T3. The insert schematically illustrates  
686 the microvillar orientation for each of these cells.

687

688 Fig. 2. Schematic of setup which contains a rotating arm with the light stimulus (that could be  
689 moved freely during recordings), a polarization filter that can be rotated, and a sloped specimen  
690 holder within a small glass container (filled with saline solution) onto which the larvae was  
691 mounted so that the principal eyes were oriented horizontally. During experiments a sharp glass  
692 electrode was inserted near the back of each eye tube, and the indifferent electrode was placed  
693 into the saline solution.

694

695 Fig 3. Histological images. A. Transmission electron micrograph of a cross section of the  
696 proximal retina of E2 of a third instar larva. As has been the case for first instar larvae, three  
697 distinct cell types are discernable: T1 and T3 have vertically oriented microvilli. T2 is situated  
698 between T1 and T3 and has horizontally oriented microvilli that are immediately adjacent to the  
699 microvilli of T1 and T3 (with two sets of microvilli for each cell). MT1-3 indicate the position  
700 of microvilli for each cell. B. Example of a neurobiotin stained T2 cell. The bright staining of  
701 the cell is visible between the unstained rhabdomeric portions of T1 and T3, which is specific to  
702 T2 cells. C. Example of a T1 cell, which is characterized by bright staining of the center of one  
703 of the large rhabdoms.

704

705 Fig. 4. Example recording of a cell that was most sensitive to horizontally polarized light. A.  
706 During stimulation with light pulses the e-vector orientation was turned through 180 degrees in 5  
707 degree steps. B. Response of the cell to a single 20 ms stimulus at the e-vector orientation (185°)  
708 that yielded the maximum response. C. Response of the cell to the e-vector orientation (265°)  
709 that yielded the minimum response.

710

711 Fig. 5. Average relative response magnitude at different e-vector directions. The response  
712 magnitude of each cell was normalized to minimum response = 0 and maximum response = 1. A.



713 Average relative response magnitude with s.d. for E1. Cells most sensitive to horizontally (H, n  
714 = 6) and vertically (V, n = 8) polarized light. B. Average relative response magnitude, with s.d.,  
715 for E2 (H, n = 11; V, n = 12).

716

717 Fig. 6. Average normalized V-logI curves with s.d. and polarization sensitivity (PS) values of  
718 cells most sensitive to vertically (V) and horizontally (H) polarized light. The PS was calculated  
719 from the shift of the V-logI curves. A. Cells of E1 most sensitive to horizontally polarized light  
720 (n = 5). B. Cells of E2 most sensitive to horizontally polarized light cells (n = 9). C. Cells of E1  
721 most sensitive to vertically polarized light (n = 7). D. Cells of E2 most sensitive to vertically  
722 polarized light (n = 13). E and F. PS values of E1 and E2 respectively.

723

724 Fig. 7. Change in response magnitude of E1 and E2 cells most sensitive to vertically and  
725 horizontally polarized light. A. Data of all cells. Triangles indicate a population of cells that is  
726 most sensitive to vertically polarized light with a relatively low modulation, when compared to  
727 other cells with equivalent e-vector orientation sensitivity (squares). Diamonds indicate cells  
728 that are most sensitive to horizontally polarized light. B. Average of all cells (with s.d.) after  
729 separating vertical sensitive cells into shallow and large modulation groups.

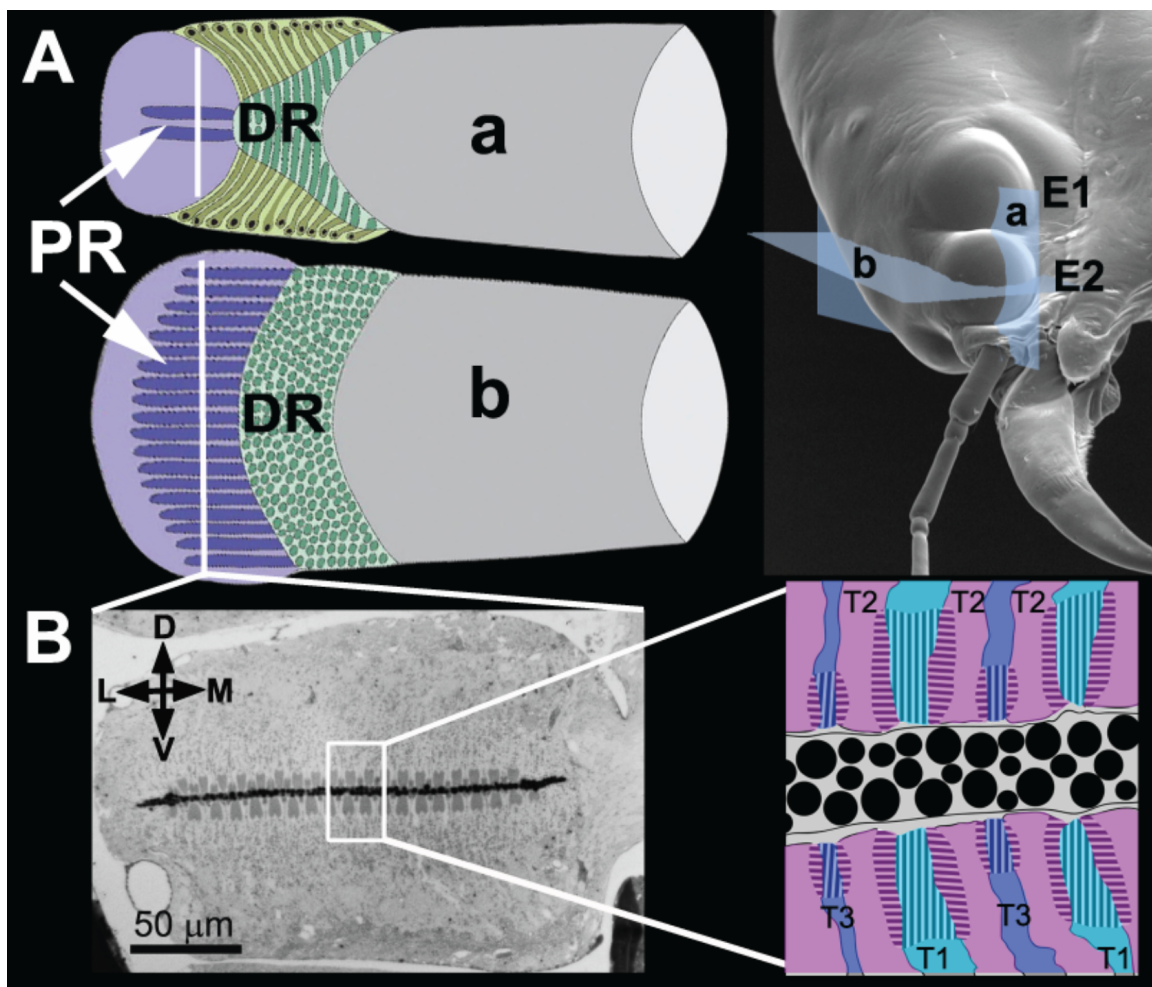

Fig. 1

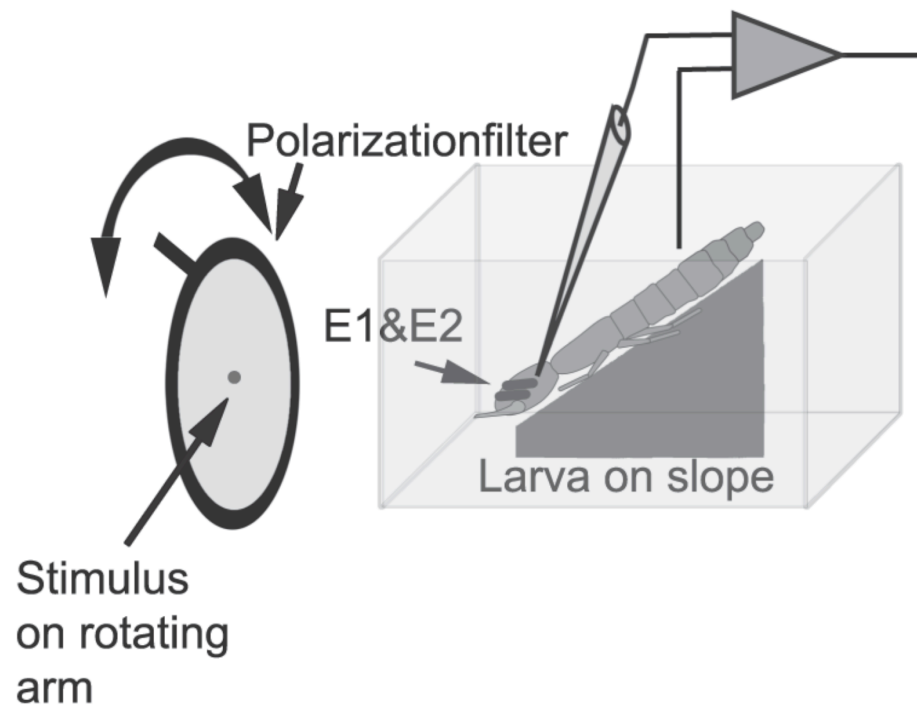

Fig. 2

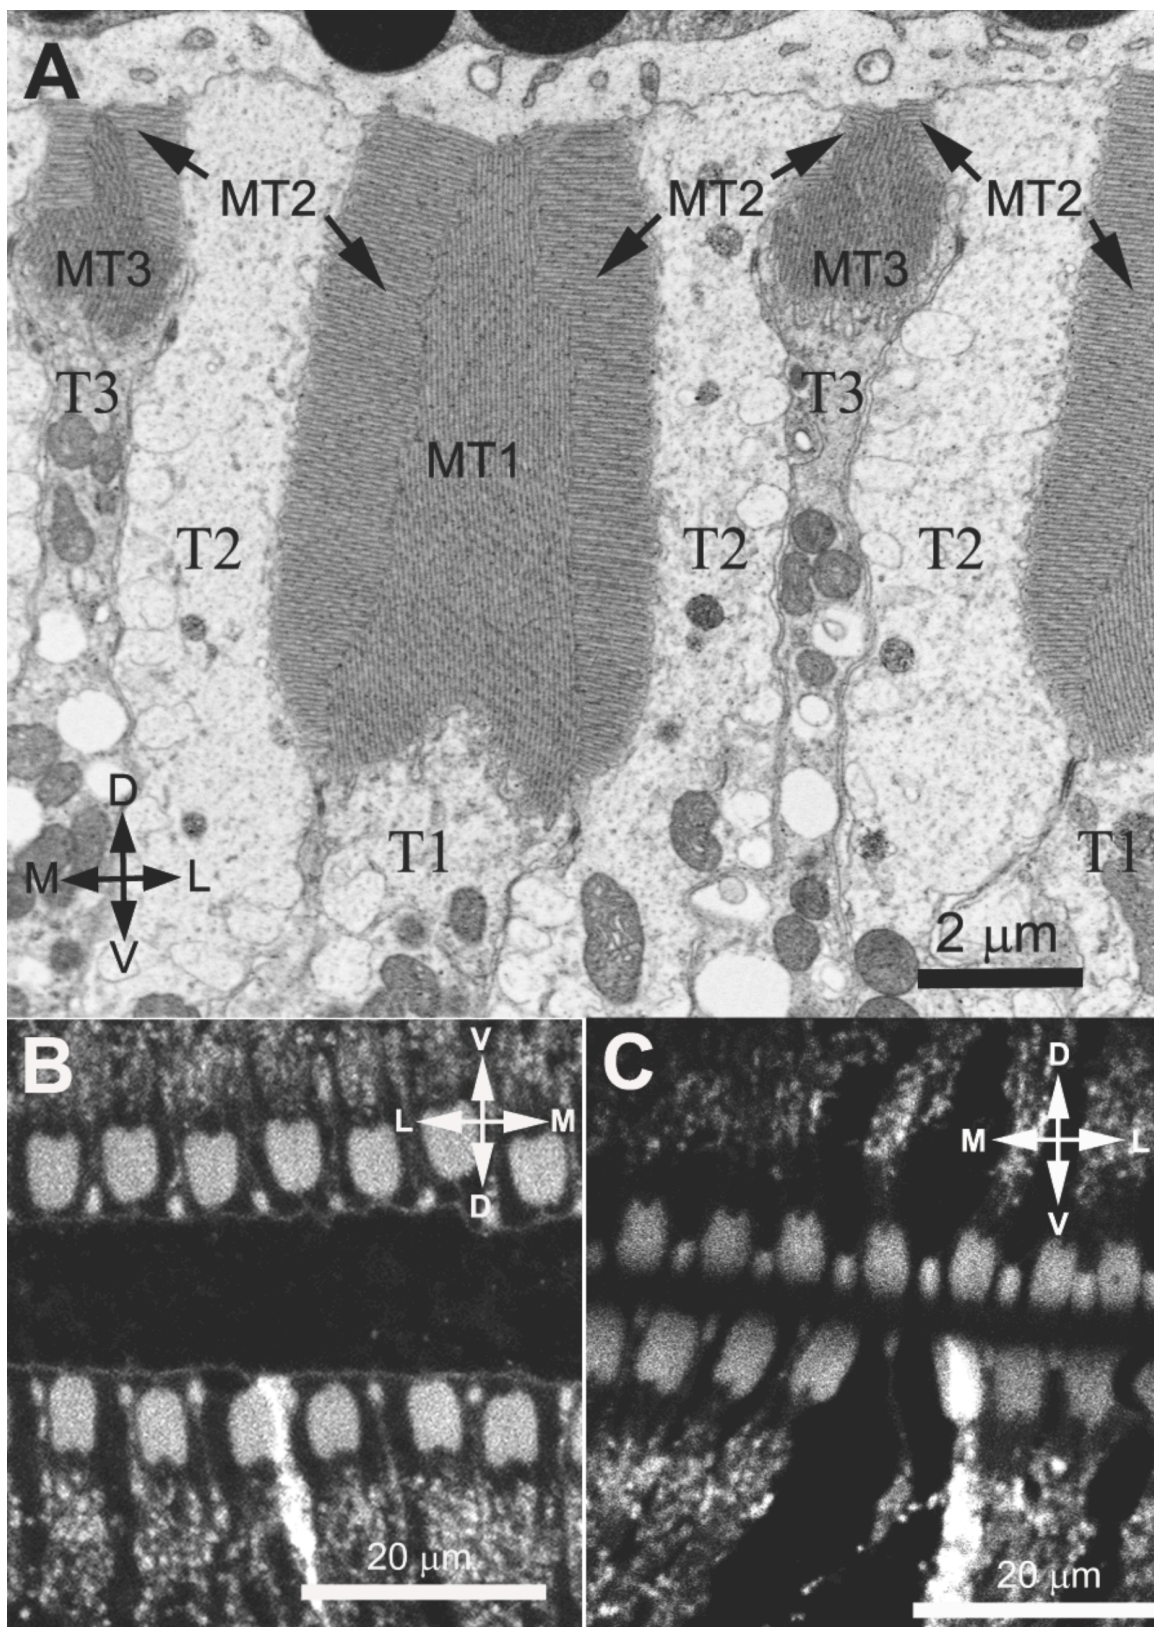

Fig. 3

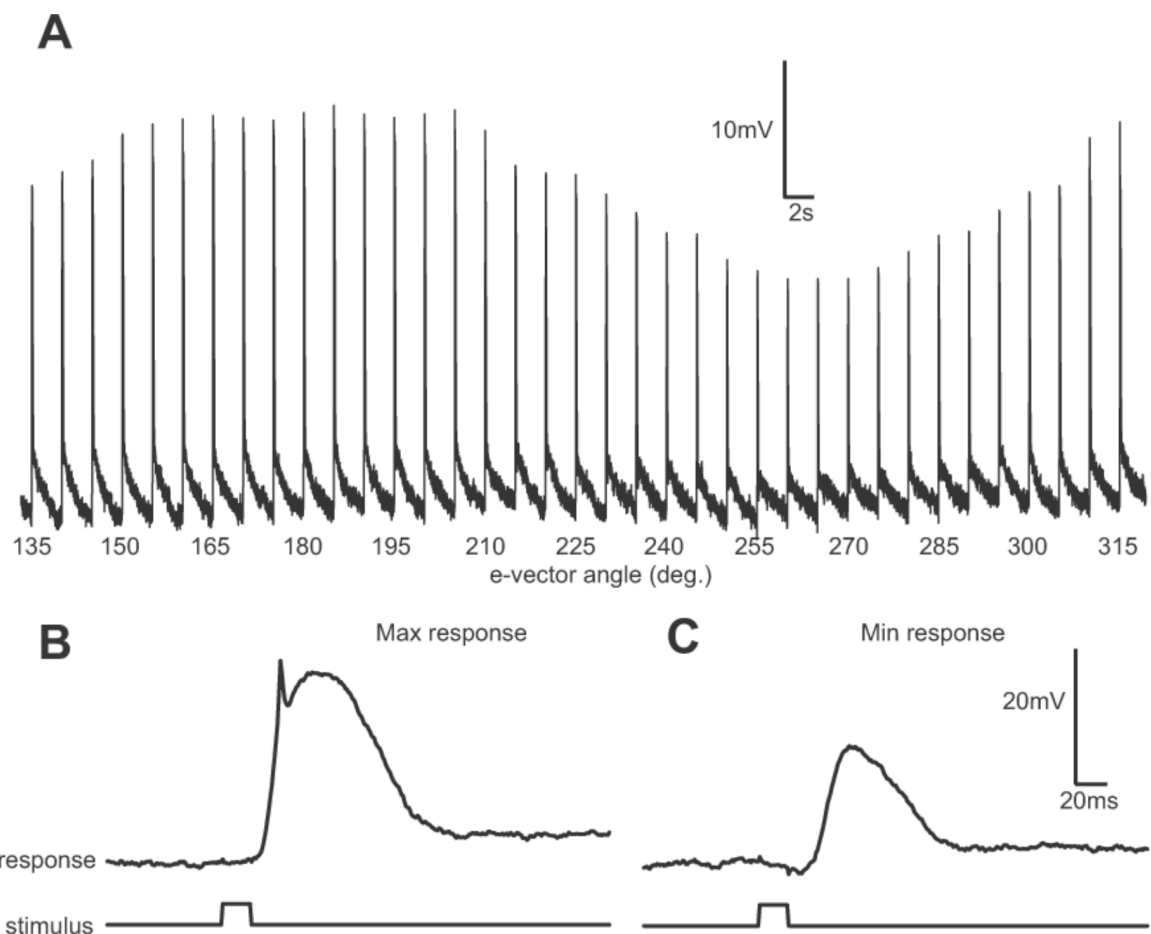

Fig. 4

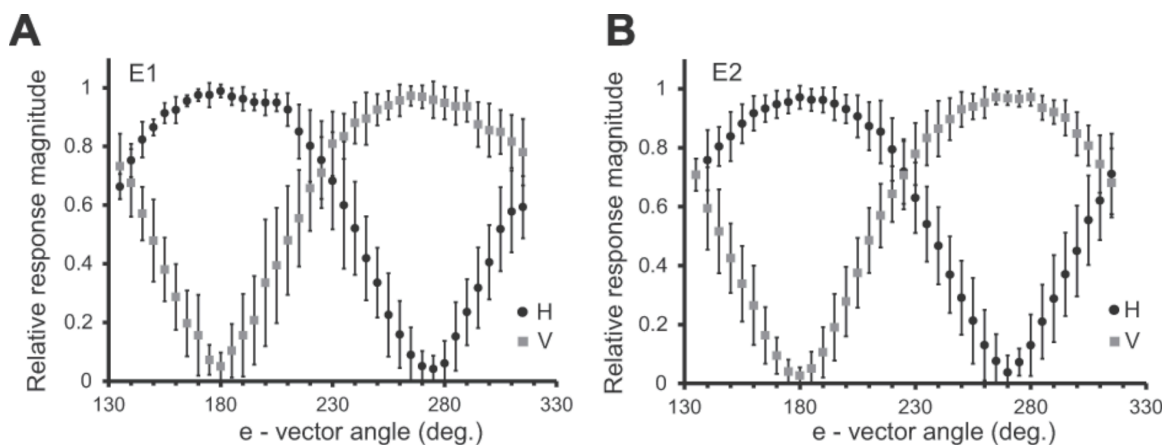

Fig 5

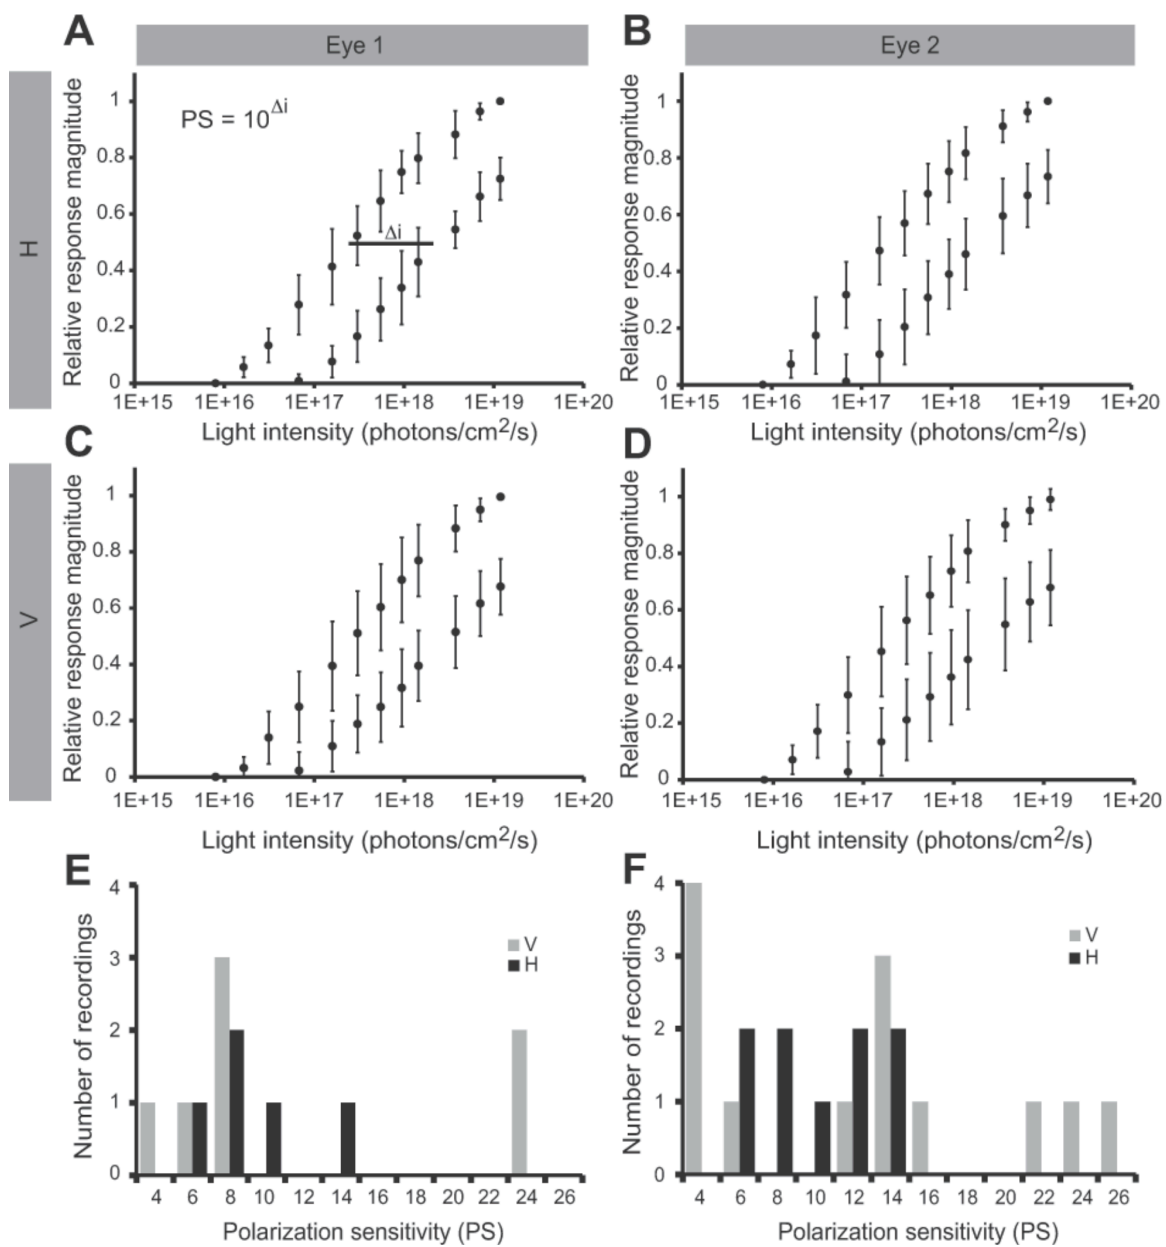

Fig.6

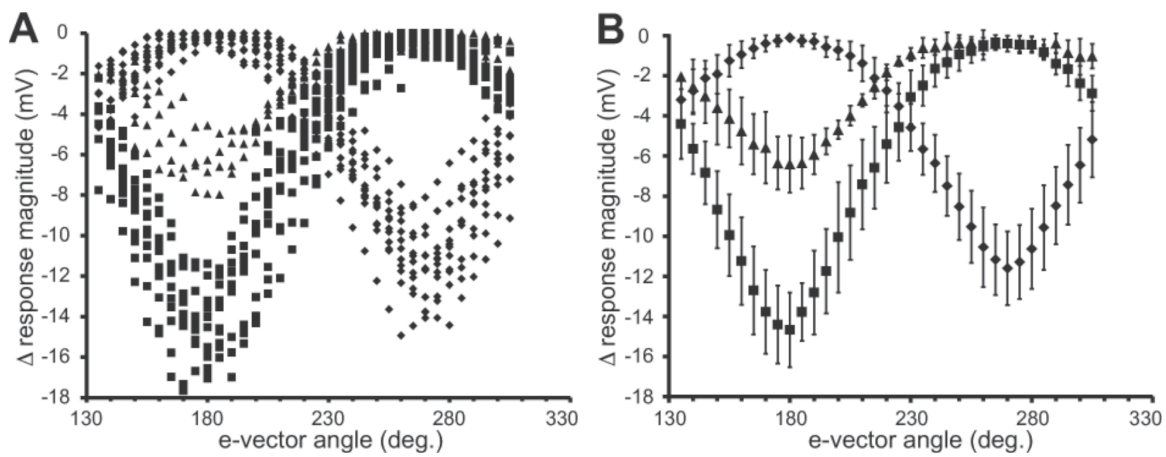

Fig. 7
